# Supplementary material for: Regulation of Cysteine Homeostasis and Its Effect on Escherichia coli Sensitivity to Ciprofloxacin in LB Medium
Source: MDPI journal article supplement (doi:10.3390/ijms25084424), 2024-04-17
Supplement: s1 [file s1]

**Table S1.** *Escherichia coli* strains and plasmids used in this study.

| Strain    | Genotype                                                                                                                  | Source                         |
|-----------|---------------------------------------------------------------------------------------------------------------------------|--------------------------------|
| BW25113   | $\Delta(araD-araB)567$ , $\Delta lacZ4787(::rrnB-3)$ , $\lambda$ , <i>rph-1</i> , $\Delta(rhaD-rhaB)568$ , <i>hsdR514</i> | Baba et al., 2006 [1]          |
| JW2663    | as BW25113, but $\Delta gshA$                                                                                             | Baba et al., 2006 [1]          |
| JW5250    | as BW25113, but $\Delta eamA$                                                                                             | Baba et al., 2006 [1]          |
| JW2562    | as BW25113, but $\Delta eamB$                                                                                             | Baba et al., 2006 [1]          |
| JW5363    | as BW25113, but $\Delta bcr$                                                                                              | Baba et al., 2006 [1]          |
| JW2407    | as BW25113, but $\Delta cysK$                                                                                             | Baba et al., 2006 [1]          |
| JW2414    | as BW25113, but $\Delta cysM$                                                                                             | Baba et al., 2006 [1]          |
| JW2505    | as BW25113, but $\Delta mstA$ ( <i>sseA</i> )                                                                             | Baba et al., 2006 [1]          |
| JW1614    | as BW25113, but $\Delta malY$                                                                                             | Baba et al., 2006 [1]          |
| JW2975    | as BW25113, but $\Delta metC$                                                                                             | Baba et al., 2006 [1]          |
| JW5518    | as BW25113, but $\Delta cyuA$ ( <i>yhaM</i> )                                                                             | Baba et al., 2006 [1]          |
| JW2514    | as BW25113, but $\Delta iscS$                                                                                             | Baba et al., 2006 [1]          |
| JW3686    | as BW25113, but $\Delta tnaA$                                                                                             | Baba et al., 2006 [1]          |
| JW1267    | as BW25113, but $\Delta cysB$                                                                                             | Baba et al., 2006 [1]          |
| JW0437    | as BW25113, but $\Delta cyuR$ ( <i>ybaO</i> )                                                                             | Baba et al., 2006 [1]          |
| JW1718    | as BW25113, but $\Delta tcyP$ ( <i>ydjN</i> )                                                                             | Baba et al., 2006 [1]          |
| AN2342    | K-12 derivative, F-                                                                                                       | Cruz-Ramos et al., 2004 [2]    |
| AN2343    | as AN2342 <i>cydD1</i> , G319D, G429E                                                                                     | Cruz-Ramos et al., 2004 [2]    |
| DM4000    | <i>hisG4 argE3 thr-1- ara-14 xyl-5 mtl-1 rpsL31 tsx-33 ilv TS sulA::Mud1(bla lac) cam</i>                                 | Volkert et al. 1989 [3]        |
| Plasmids  |                                                                                                                           |                                |
| pKT1033   | <i>katG::lacZ</i>                                                                                                         | Tao et al. 1989 [4]            |
| pColV-K30 | <i>iucC::lacZ</i>                                                                                                         | Maringanti and Imlay, 1999 [5] |

## References

1. Baba, T.; Ara, T.; Hasegawa, M.; Takai, Y.; Okumura, Y.; Baba, M.; Datsenko, K.A.; Tomita, M.; Wanner, B.L.; Mori, H. Construction of *Escherichia coli* K-12 in-frame, single-gene knockout mutants: The Keio collection. *Mol. Syst. Biol.* **2006**, *2*, 2006.0008. <https://doi.org/10.1038/msb4100050>.
2. Cruz-Ramos, H.; Cook, G.M.; Wu, G.; Cleeter, M.W.; Poole, R.K. Membrane topology and mutational analysis of *Escherichia coli* CydDC, an ABC-type cysteine exporter required for cytochrome assembly. *Microbiology* **2004**, *150*, 3415–3427. <https://doi.org/10.1099/mic.0.27191-0>.
3. Volkert, M.R.; Gately, F.H.; Hajec, L.I. Expression of DNA damage-inducible genes of *Escherichia coli* upon treatment with methylating, ethylating and propylating agents. *Mutat. Res.* **1989**, *217*, 109–115. [https://doi.org/10.1016/0921-8777\(89\)90062-1](https://doi.org/10.1016/0921-8777(89)90062-1).
4. Tao, K.; Makino, K.; Yonei, S.; Nacata, A.; Shinagawa, H. Molecular cloning and nucleotide sequencing of *oxyR*, the positive regulatory gene of a regulon for an adaptive response to oxidative stress in *Escherichia coli*: Homologies between OxyR protein and a family of bacterial activator proteins. *Mol. Gen. Genet.* **1989**, *218*, 371–376. <https://doi.org/10.1007/bf00332397>.
5. Maringanti, S.; Imlay, J.A. An intracellular iron chelator pleiotropically suppresses enzymatic and growth defects of superoxide dismutase-deficient *Escherichia coli*. *J. Bacteriol.* **1999**, *181*, 3792–3802. <https://doi.org/10.1128/JB.181.12.3792-3802.1999>.
