# Supplementary material for: Regulation of Cysteine Homeostasis and Its Effect on Escherichia coli Sensitivity to Ciprofloxacin in LB Medium
Source: MDPI journal article supplement (doi:10.3390/ijms25084424), 2024-04-17
Supplement: s1 [file s1]

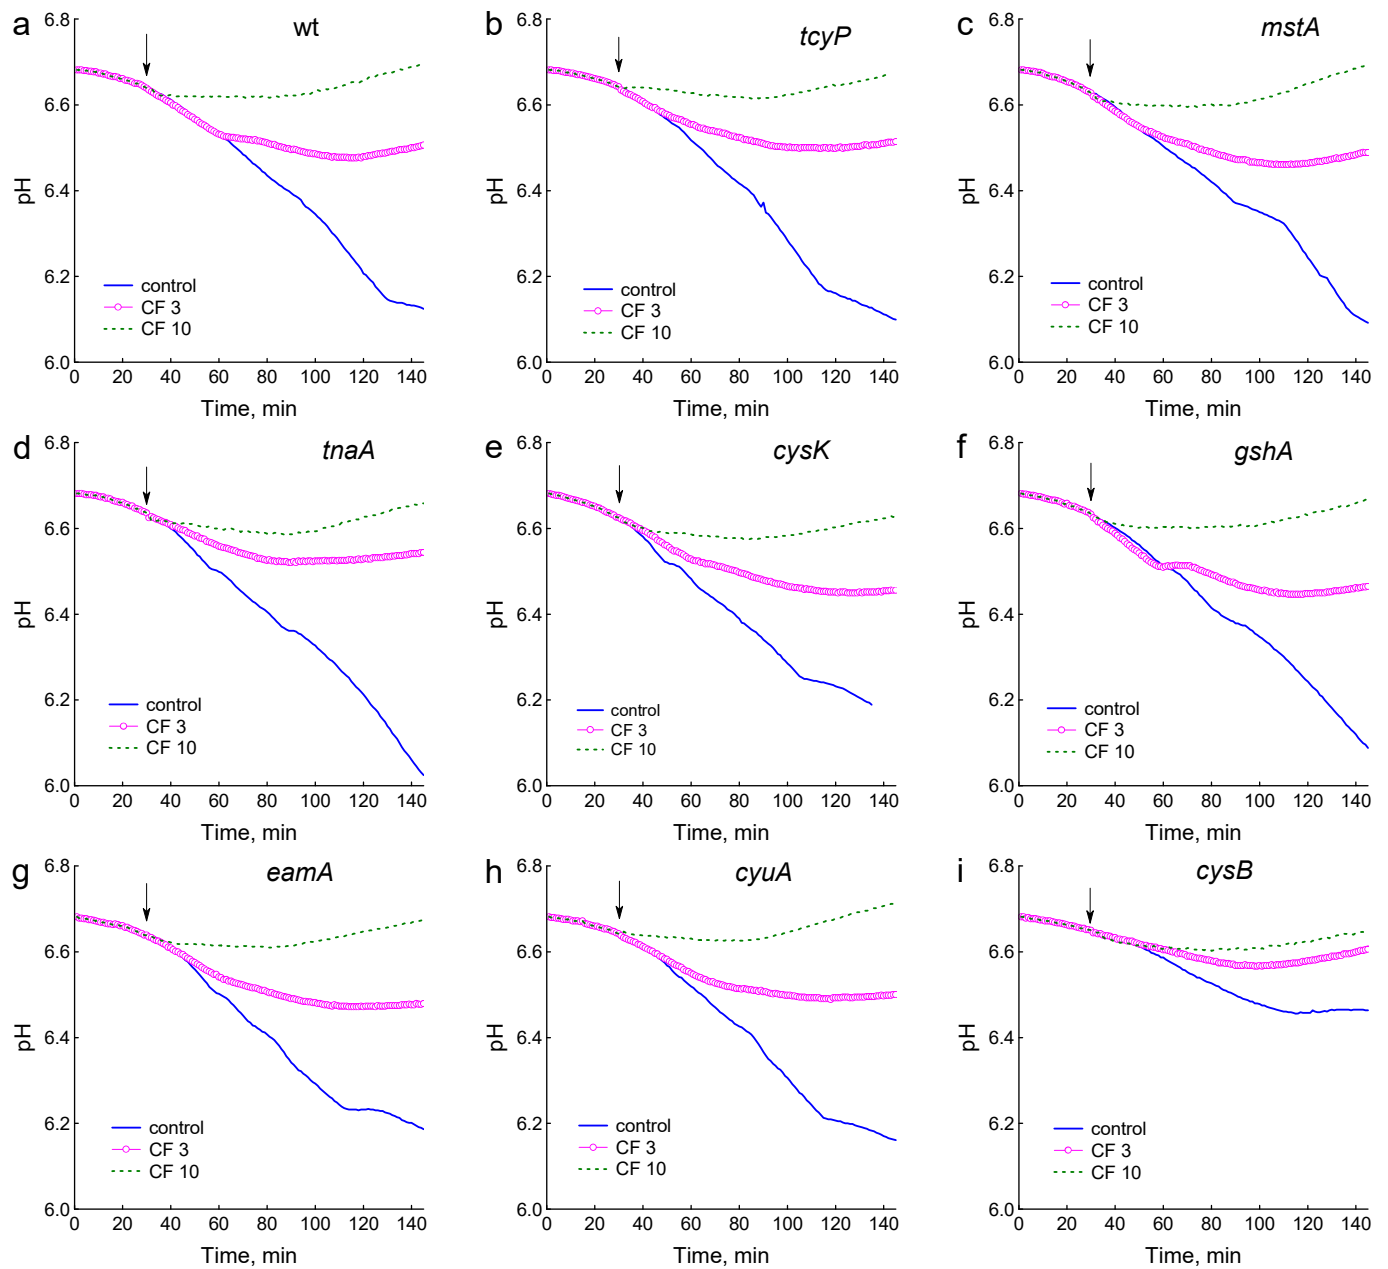

**Figure S6.** Effect of ciprofloxacin (3 and 10  $\mu\text{g/ml}$ ) on pH changes in the culture medium of the studied *E. coli* strains. The time for adding ciprofloxacin is indicated by the arrow.
