# Supplementary material for: Regulation of Cysteine Homeostasis and Its Effect on Escherichia coli Sensitivity to Ciprofloxacin in LB Medium
Source: MDPI journal article supplement (doi:10.3390/ijms25084424), 2024-04-17
Supplement: s1 [file s1]

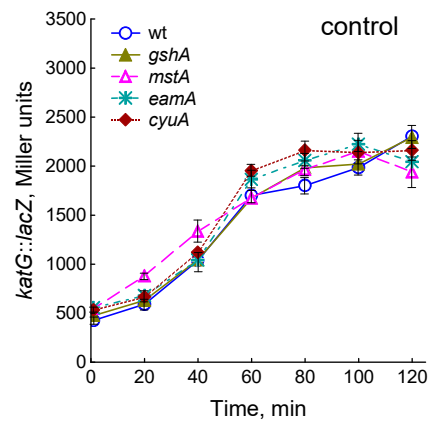

**Figure S3.** The expression of *katG::lacZ* in the *gshA*, *mstA*, *eamA*, and *cyuA* mutants does not differ significantly from the parental strain.
