# Supplementary material for: Regulation of Cysteine Homeostasis and Its Effect on Escherichia coli Sensitivity to Ciprofloxacin in LB Medium
Source: MDPI journal article supplement (doi:10.3390/ijms25084424), 2024-04-17
Supplement: s1 [file s1]

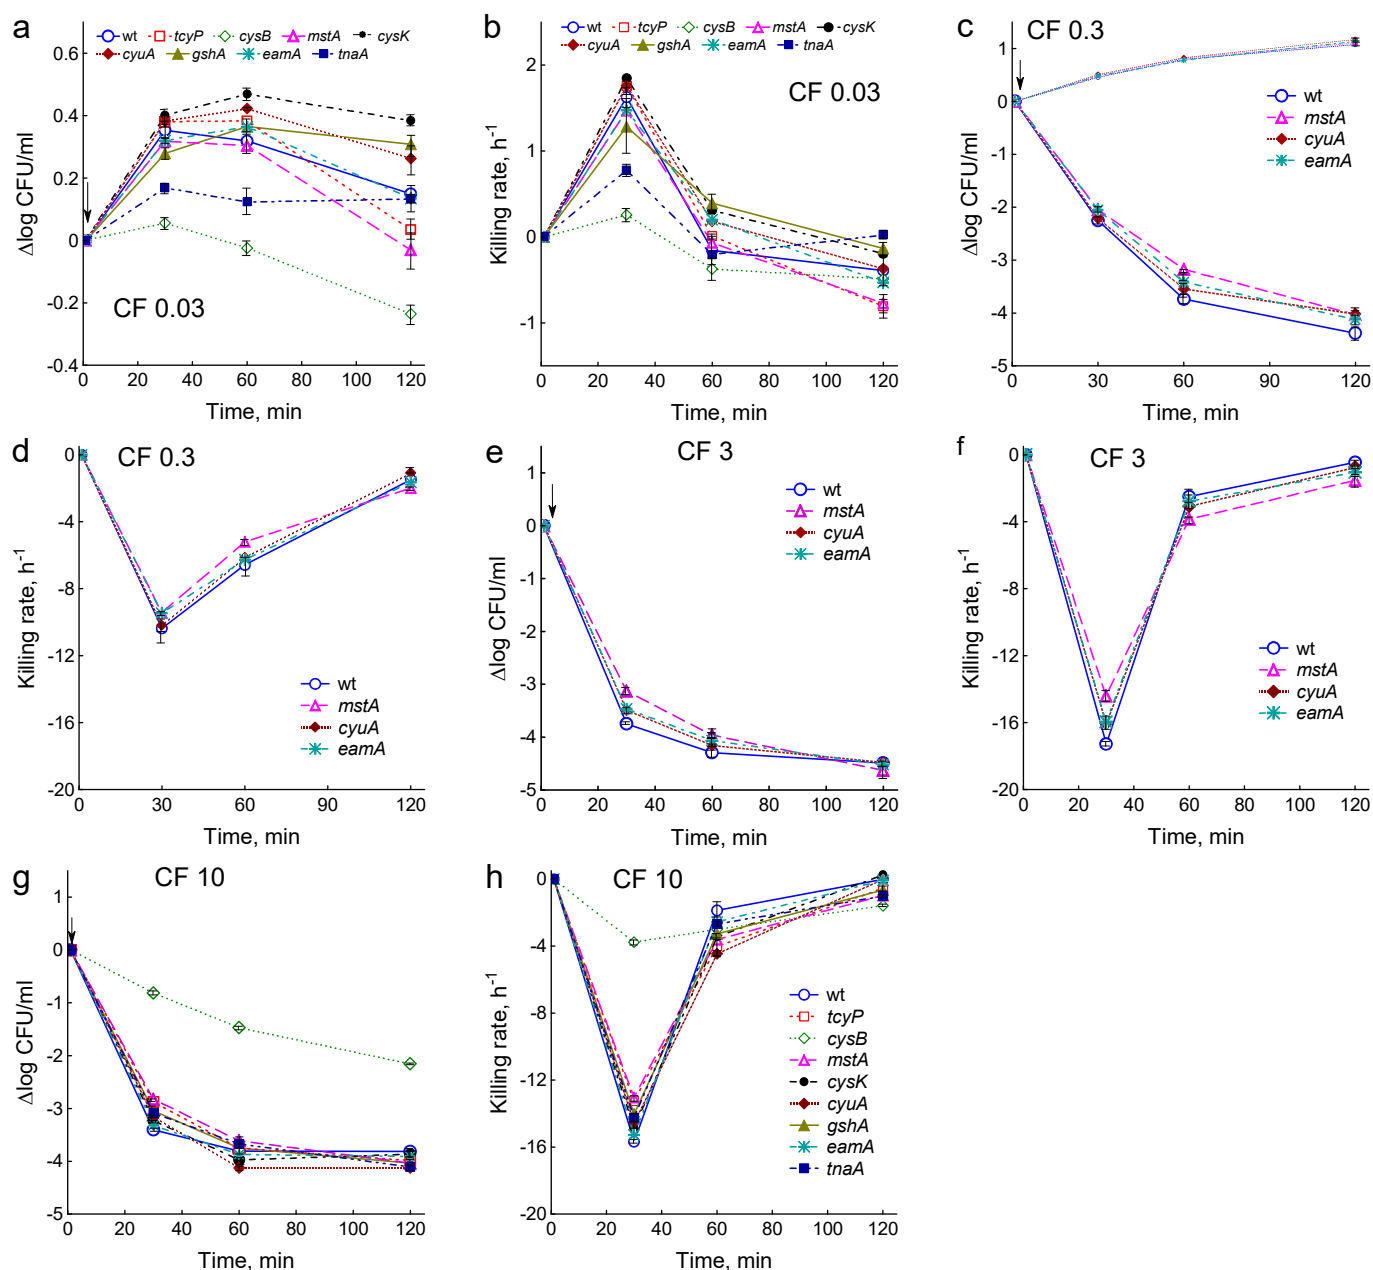

**Figure S7.** Killing curves (a,c,e,g) and killing rate (b,d,f,h) upon exposure of studied *E. coli* mutants to 0.03 (a,b), 0.3 (c,d), 3 (e,f) and 10 µg/ml (g,h) ciprofloxacin. The time for adding ciprofloxacin is indicated by the arrow. Values are the means and standard error (vertical bars) from at least three independent experiments.
