# Supplementary material for: Regulation of Cysteine Homeostasis and Its Effect on Escherichia coli Sensitivity to Ciprofloxacin in LB Medium
Source: MDPI journal article supplement (doi:10.3390/ijms25084424), 2024-04-17
Supplement: s1 [file s1]

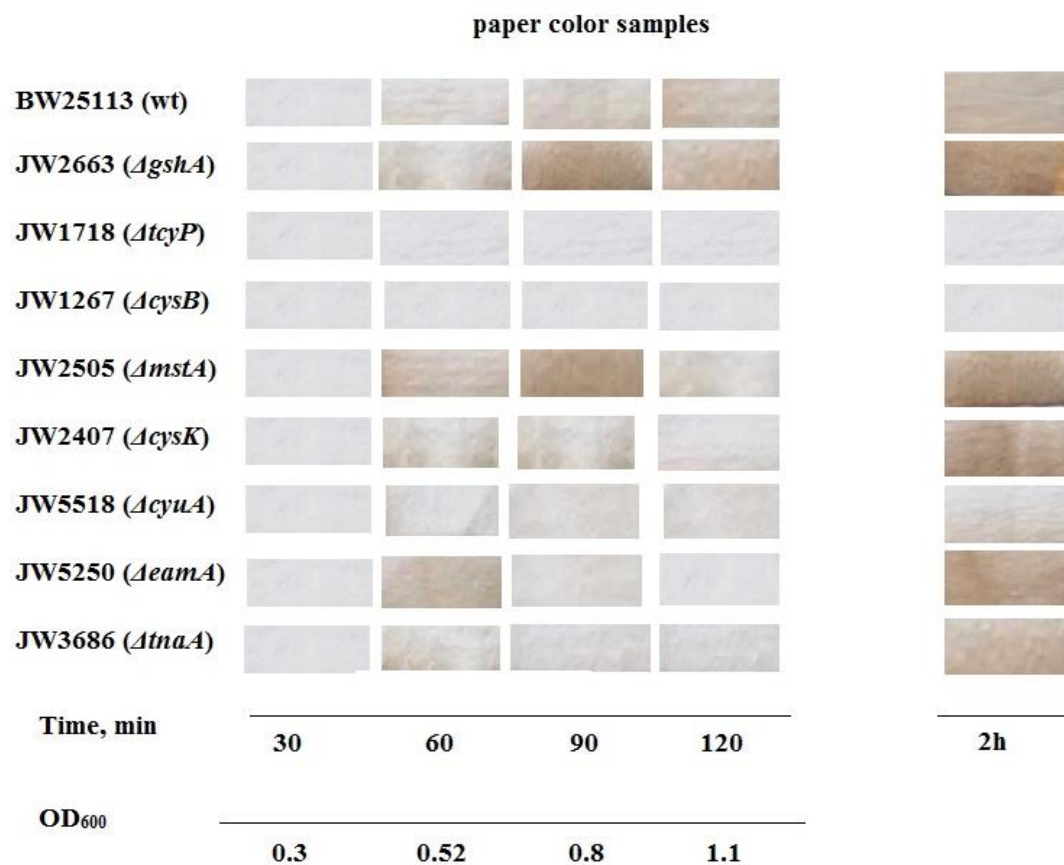

**Figure S1.** H<sub>2</sub>S accumulation in the gas phase of *E. coli* wt and mutant strains. Shown are samples of lead acetate-soaked paper strips after successive 30-minute exposures (left) or 2-hour exposure (right) over the surface of cultures growing in LB medium. For each time point, the corresponding value of the optical density of the culture (OD<sub>600</sub>) is indicated.
