# Supplementary material for: Regulation of Cysteine Homeostasis and Its Effect on Escherichia coli Sensitivity to Ciprofloxacin in LB Medium
Source: MDPI journal article supplement (doi:10.3390/ijms25084424), 2024-04-17
Supplement: s1 [file s1]

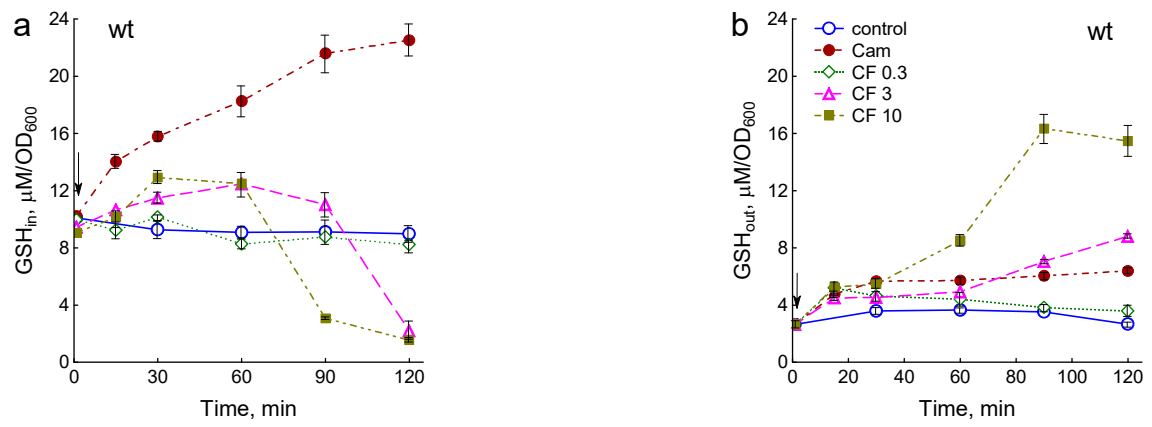

**Figure S2.** Changes in intracellular ( $\text{GSH}_{\text{in}}$ ) (a) and extracellular ( $\text{GSH}_{\text{out}}$ ) (b) glutathione when *E. coli* BW25113 (wt) was treated with chloramphenicol (Cam 25  $\mu\text{g}/\text{ml}$ ) or ciprofloxacin (CF 0.3-10  $\mu\text{g}/\text{ml}$ ).
