# Supplementary figures and images for: Regulation of Cysteine Homeostasis and Its Effect on Escherichia coli Sensitivity to Ciprofloxacin in LB Medium
Source: MDPI journal article supplement (doi:10.3390/ijms25084424), 2024-04-17

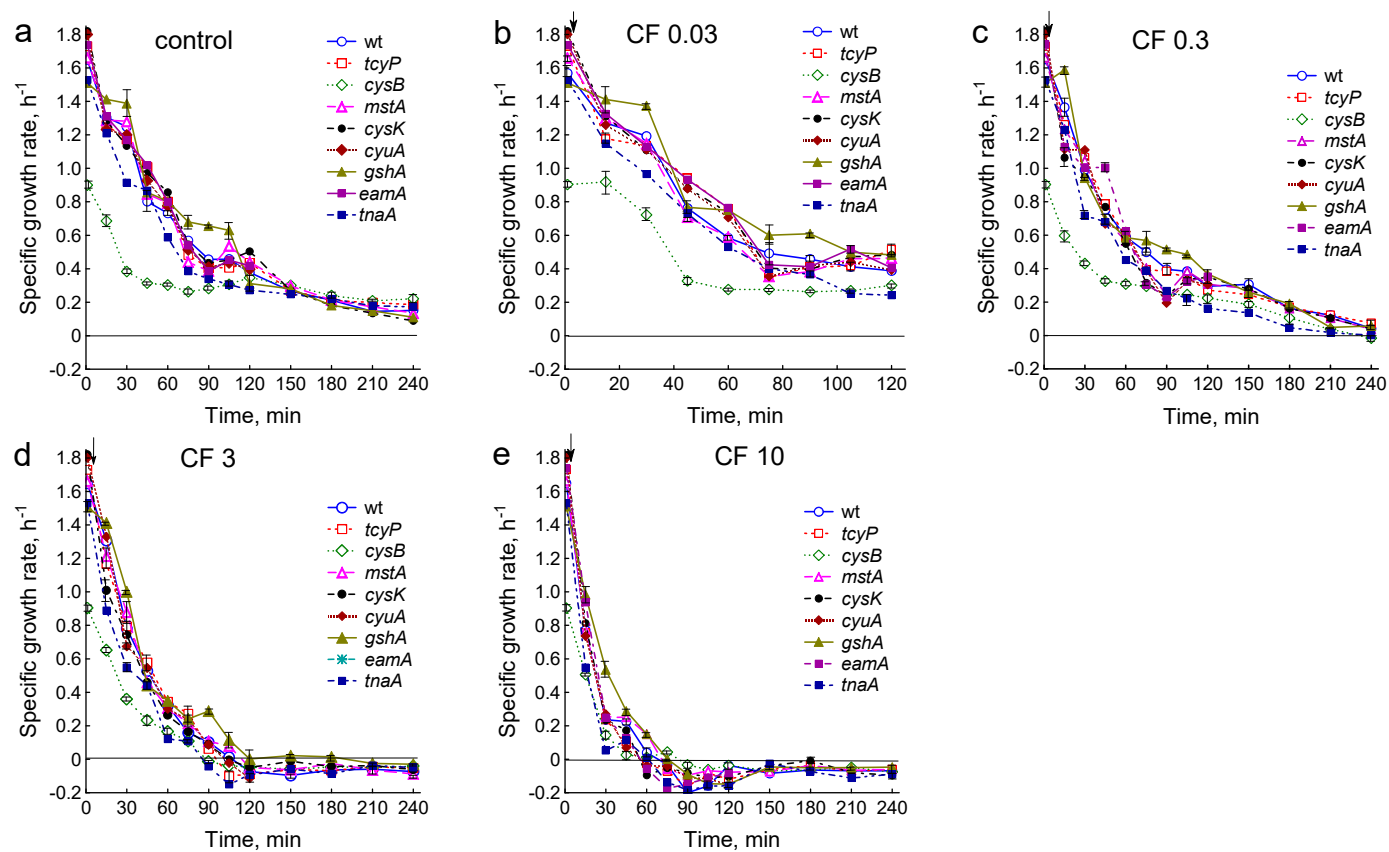

**Figure S4.** Effect of ciprofloxacin on the specific growth rate of the studied mutants.

Supplement: s1 [file s1]
